# Supplementary material for: Implementation fidelity of a nurse-led falls prevention program in acute hospitals during the 6-PACK trial
Source: Springer Nature journal article supplement (doi:10.1186/s12913-017-2315-z), 2017-06-02
Supplement: MOESM3 [file 12335522]

### Additional file 3: Influencing factors to implementation of the 6-PACK program: Staff acceptability by hospital

#### Hospitals 1-3

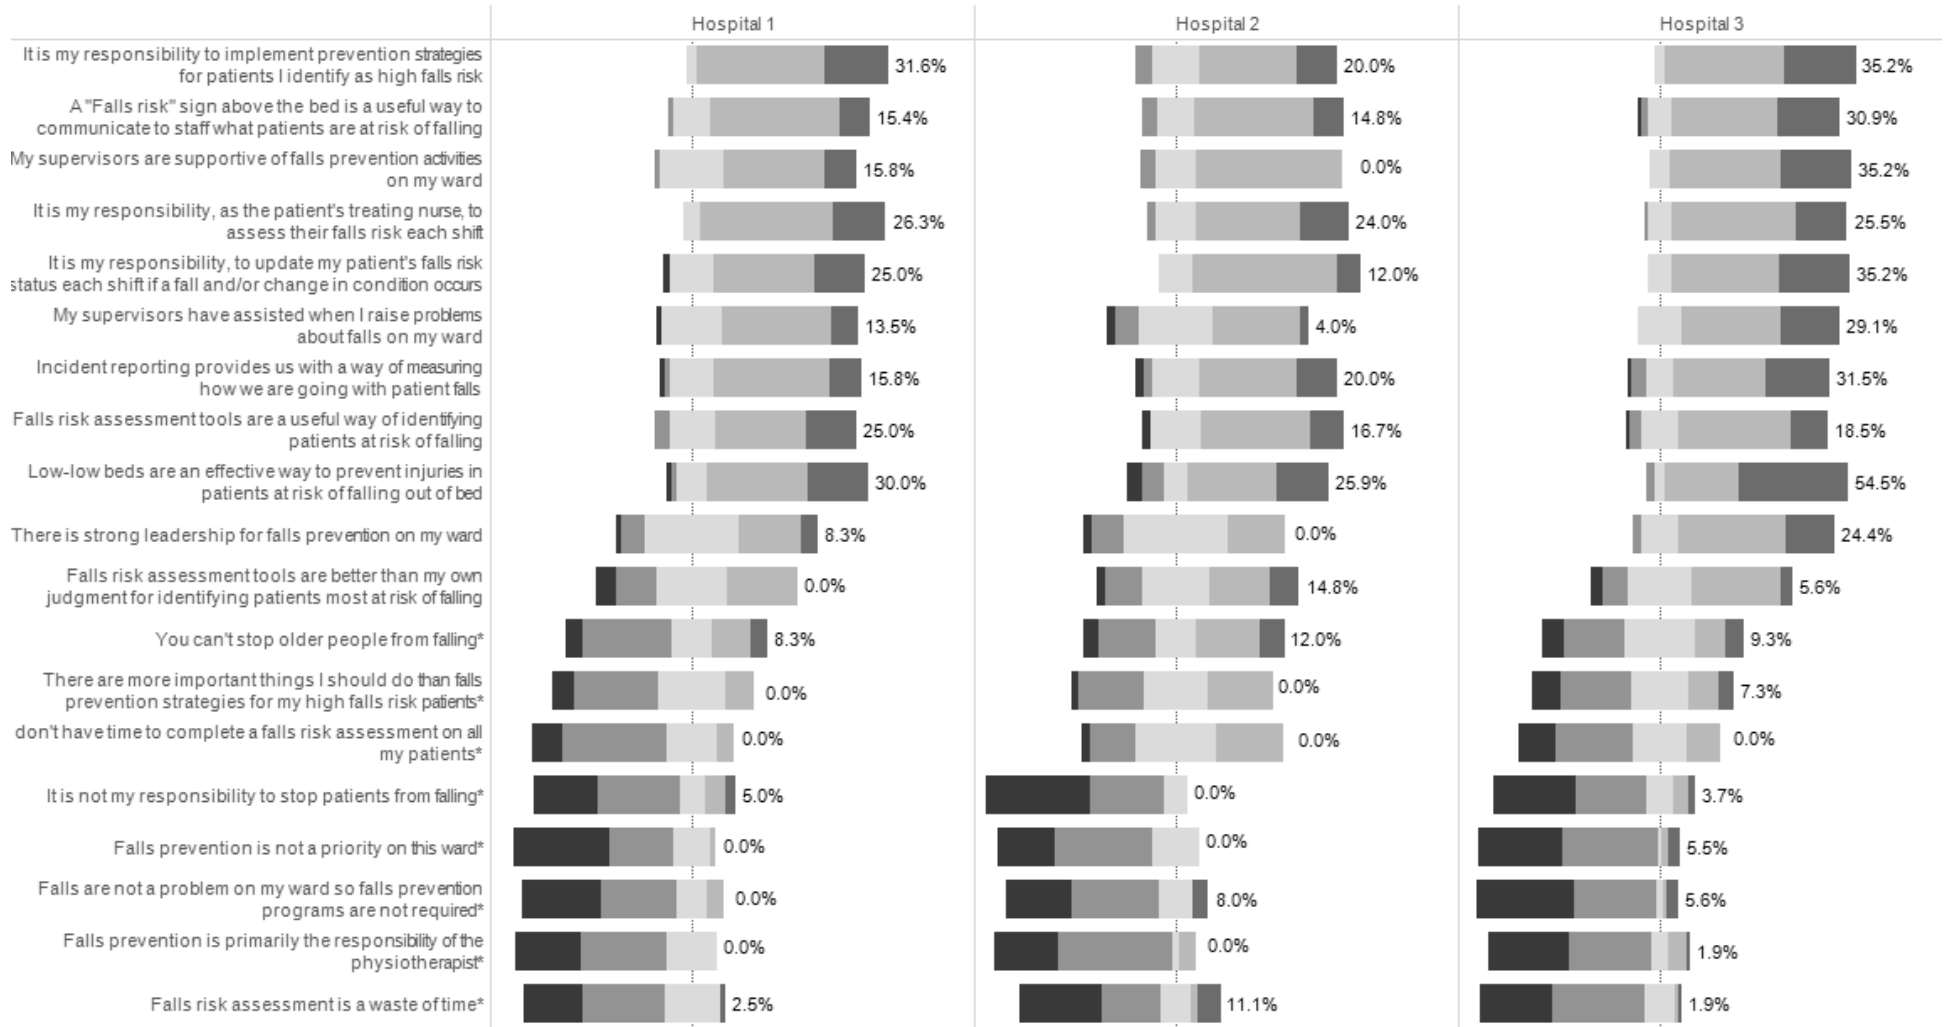

\*Negatively worded item.  
Labels represent percentage of 'strongly agree.'

Strongly disagree   Disagree   Neutral   Agree   Strongly agree

## Hospitals 4-6

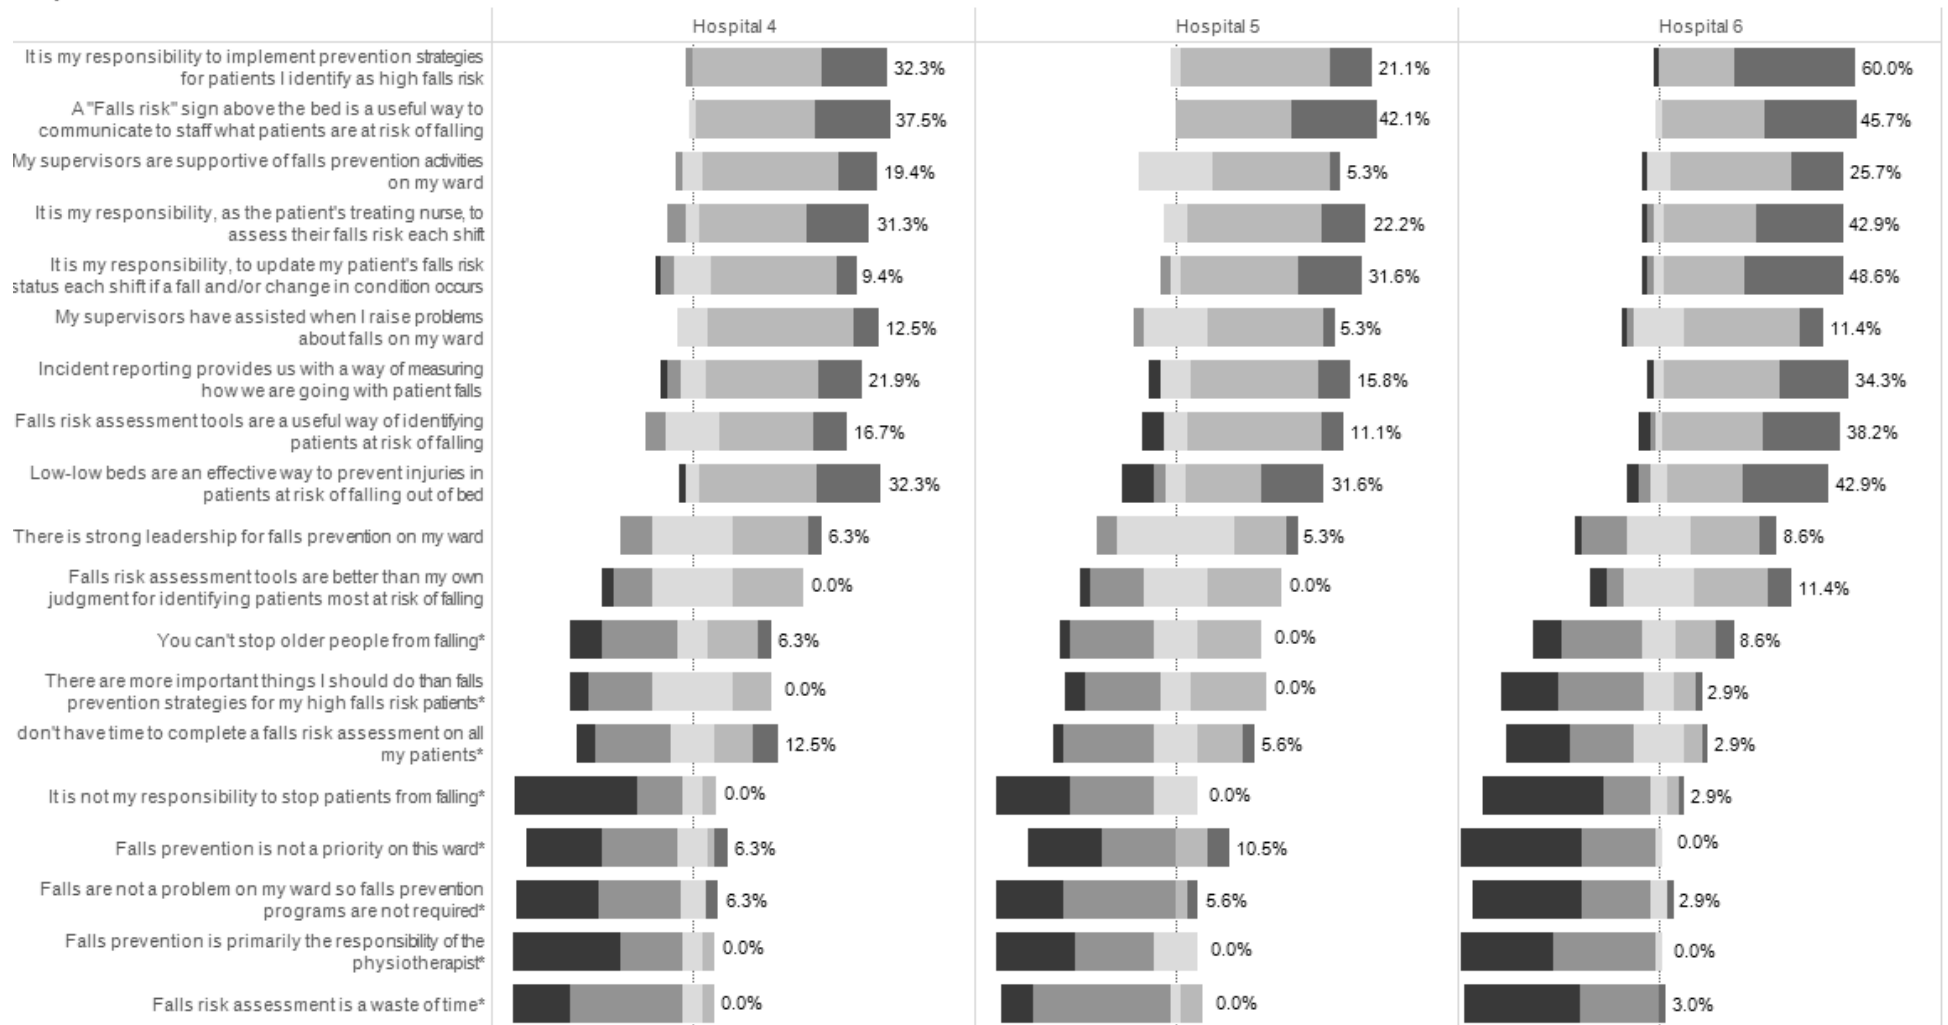

\* Negatively worded item.  
Labels represent percentage of 'strongly agree'.

Strongly disagree
  Disagree
  Neutral
  Agree
  Strongly agree
